# Supplementary material for: Elevated Soluble TNF-Receptor 1 in the Serum of Predementia Subjects with Cerebral Small Vessel Disease
Source: MDPI journal article supplement (doi:10.3390/biom13030525), 2023-03-13
Supplement: s1 [file s1]

# Salai *et al.* Elevated Soluble TNF-Receptor 1 in the Serum of Predementia Subjects with Cerebral Small Vessel Disease

## Supplementary Figures and Tables

**Table S1** Summary of Neuropsychological Battery and Component Tests

| Cognitive Domain          | Component Test(s)                                                                                                                           |
|---------------------------|---------------------------------------------------------------------------------------------------------------------------------------------|
| 1. Executive Function:    | Verbal Fluency [1], Color Trail Test A&B [2]                                                                                                |
| 2. Working Memory:        | Digit Span Forward and Backward [3]                                                                                                         |
| 3. Language:              | 15-item Modified Boston Naming Test [4]                                                                                                     |
| 4. Visuospatial Function: | Rey Complex Figure Test-copy [5]                                                                                                            |
| 5. Visuomotor Speed:      | Symbol Digit Modalities Test [6]                                                                                                            |
| 6. Memory:                | Rey Complex Figure Test-immediate/delay recall and recognition [5], Hopkins Verbal Learning Test-immediate/delay recall and recognition [7] |

**Table S2** Association between serum sTNF-R1 tertiles and MTA at baseline

| sTNF-R1         | Significant MTA (n=49)<br>OR (95% CI)<br><i>p</i> -value |
|-----------------|----------------------------------------------------------|
| <b>Model I</b>  |                                                          |
| <b>Lowest</b>   | 1                                                        |
| <b>Middle</b>   | <b>2.61 (1.02, 6.65)</b><br><b><i>p</i> = 0.045</b>      |
| <b>Highest</b>  | <b>4.61 (1.88, 11.29)</b><br><b><i>p</i> = 0.001</b>     |
| <b>Model II</b> |                                                          |
| <b>Lowest</b>   | 1                                                        |
| <b>Middle</b>   | 2.19 (0.80, 6.00)<br><i>p</i> = 0.127                    |
| <b>Highest</b>  | 1.42 (0.49, 4.09)<br><i>p</i> = 0.518                    |

Abbreviation: CI = confidence interval; MTA = Medial Temporal Lobe Atrophy; OR = Odds ratios.

MTA imaging were available for 186 subjects. **Bold values** indicate  $p < 0.05$  using binary logistic regression.

Model I: unadjusted; Model II: adjusted for age, gender, and cardiovascular disease.

Interpretation: Lowest sTNF-R1 tertile was set as a reference group. Binary logistic regression models to significant MTA: subjects with the middle/highest sTNF-R1 tertile were OR times more likely to have significant MTA compared to those with the lowest sTNF-R1 tertile.

**Figure S1** Selection of participants

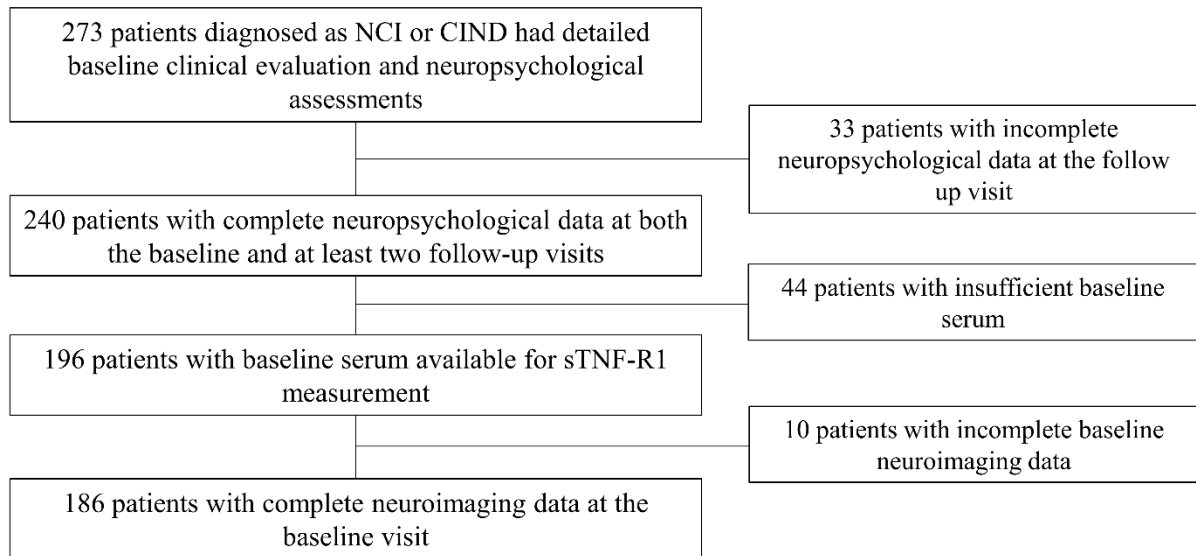

CIND = cognitive impairment no dementia; NCI = no cognitive impairment.

**Figure S2** Baseline global and specific cognitive domains z-scores of CIND subjects stratified by the tertiles of sTNF-R1.

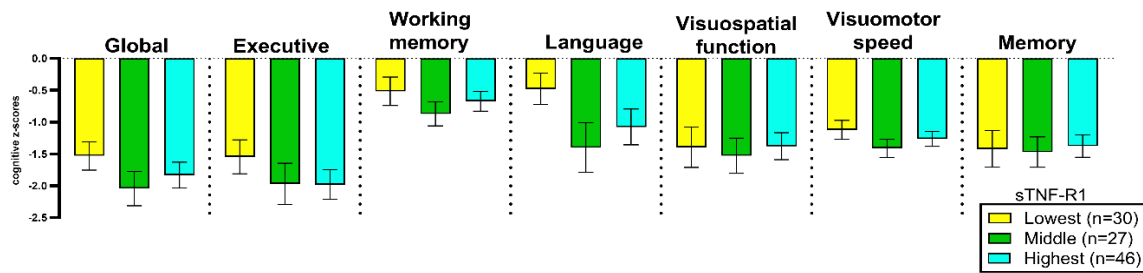

Bars are expressed as mean  $\pm$  SEM. One-way analyses of variance (ANOVA), followed by *post-hoc* Bonferroni tests, was used to analyse the differences amongst tertiles of sTNF-R1 within each cognitive domain. n = number of cases.

## REFERENCES

1. McKhann, G., et al., *Clinical diagnosis of Alzheimer's disease: Report of the NINCDS-ADRDA Work Group\* under the auspices of Department of Health and Human Services Task Force on Alzheimer's Disease*. *Neurology*, 1984. **34**(7): p. 939-939.
2. D'Elia, L., et al., *Color Trails Test*. Odessa, FL: Psychological Assessment Resources. Inc Google Scholar, 1996.
3. Wechsler, D., *Subtest Administration and Scoring. WAIS-IV: Administration and Scoring Manual*. San Antonio, TX: The Psychological Corporation, 2009: p. 87-93.
4. Mack, W.J., et al., *Boston Naming Test: shortened versions for use in Alzheimer's disease*. *Journal of gerontology*, 1992. **47**(3): p. P154-P158.
5. Meyers, J., *Meyers scoring system for the Rey complex figure test and the recognition trial*. Psychological Assessment Resources, Odessa, FL, 1994.
6. Smith, A., *Symbol digit modalities test*. 1973: Western psychological services Los Angeles.
7. Brandt, J., *The Hopkins Verbal Learning Test: Development of a new memory test with six equivalent forms*. *The clinical neuropsychologist*, 1991. **5**(2): p. 125-142.
